# Supplementary material for: Therapeutic extracellular vesicle preparation via sequential electrophoretic enrichment and counterflow microdialysis
Source: Royal Society of Chemistry journal article supplement (doi:10.1039/d5lc00870k), 2025-12-02
Supplement: d5lc00870k1.pdf [file d5lc00870k1.pdf]

## Supplementary Information

### Therapeutic Extracellular Vesicle Preparation via Electrophoretic Enrichment and Counterflow Microdialysis

Sima Mehraji,<sup>a,c</sup> Nicholas H. Pirolli,<sup>b</sup> Raith Nowak,<sup>b</sup> Steven M. Jay,<sup>b</sup> Don L. DeVoe<sup>\*a,b,c</sup>

<sup>a</sup>Department of Mechanical Engineering, University of Maryland College Park, MD

<sup>b</sup>Fischell Department of Bioengineering, University of Maryland College Park, MD

<sup>c</sup>Fischell Institute for Biomedical Devices, University of Maryland, College Park MD

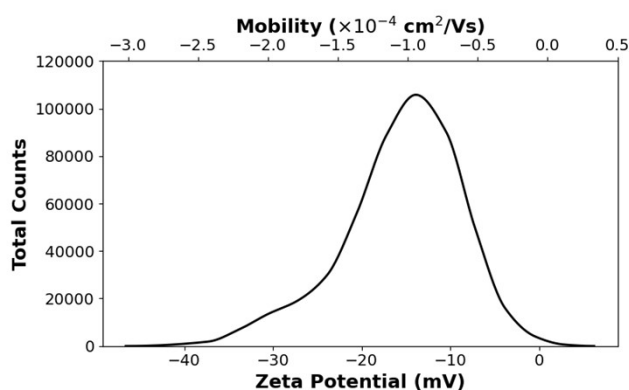

**Fig. S1:** Measured distributions of zeta potential and electrophoretic mobility for a typical EV sample following on-chip electrophoretic enrichment.

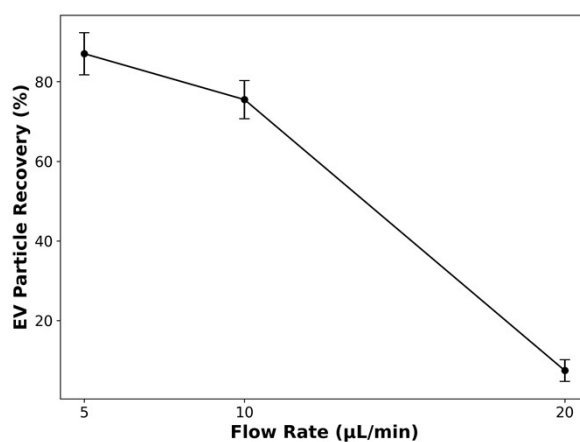

**Fig. S2:** Effect of applied voltage on EV retention during electrokinetic capture. Experimental data was collected using an input solution of  $1 \times 10^9$  vesicles/mL and 10 min capture period at 75v.

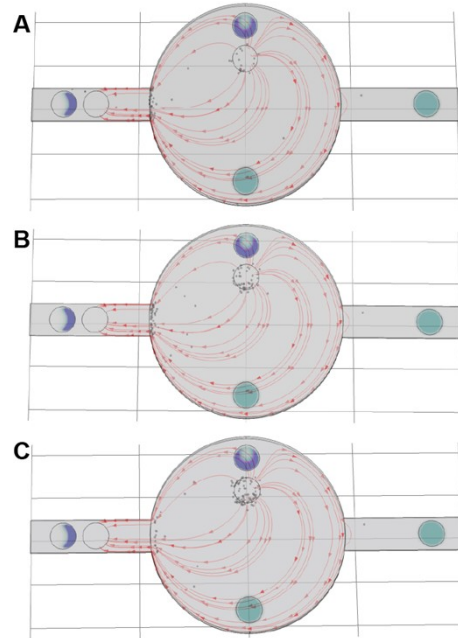

**Fig. S3:** Simulated electric field distribution and particle fate at  $t = 120$  s within the electrokinetic enrichment device at applied voltages of (A) 45 V, (B) 60 V, and (C) 75 V. Arrows indicate the direction and relative magnitude of the applied electric field.

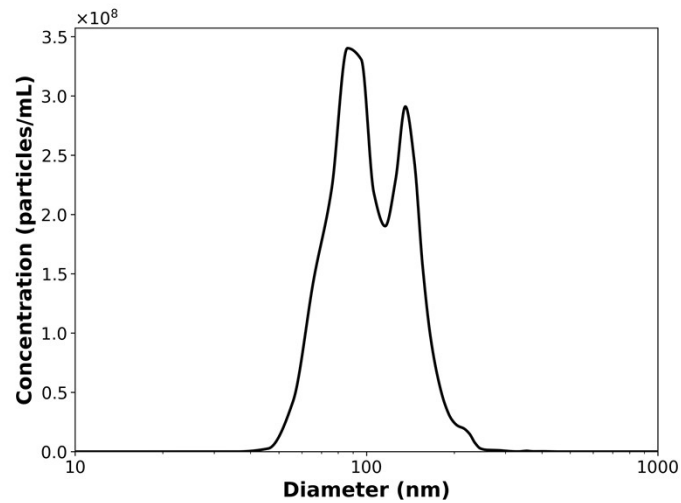

**Fig. S4:** Particle size distribution for HEK-conditioned media before enrichment.

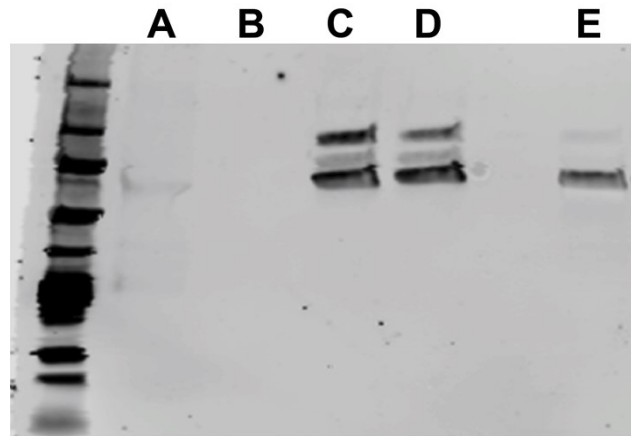

**Fig. S5:** Western blot for CD63 using (A) culture medium waste, (B) buffer waste, (C) enriched EVs (diluted 50 $\times$ ), (D) culture medium, and (E) TFF-processed culture medium. Waste and enriched EV samples were collected following 10 min enrichment at 60 V bias and 10  $\mu\text{L min}^{-1}$  flow rate.
